# Supplementary material for: Long non-coding maternally expressed gene 3 regulates cigarette smoke extract-induced apoptosis, inflammation and cytotoxicity by sponging miR-181a-2-3p in 16HBE cells
Source: PubMed Central journal article supplement — Oncol Lett. 2020 Nov 17;21(1):45. doi: 10.3892/ol.2020.12306 (PMC7693283; doi:10.3892/ol.2020.12306), 2020-11-17

Figure S1. Transfection efficiency of si-MEG3, miR-181a-2-3p and anti-miR-181a-2-3p. (A) Expression of MEG3 was measured using RT-qPCR in 16HBE cells transfected with si-NC or si-MEG3 and non-transfected group as control. (B) Level of miR-181a-2-3p was measured using RT-qPCR in 16HBE cells transfected with miR-NC, miR-181a-2-3p, anti-miR-NC, or anti-miR-181a-2-3p and non-transfected group as control. \*\* $P < 0.01$  vs. respective control. MEG3, maternally expressed gene 3; si, small interfering; RT-q, reverse transcription-quantitative; ns, not significant.

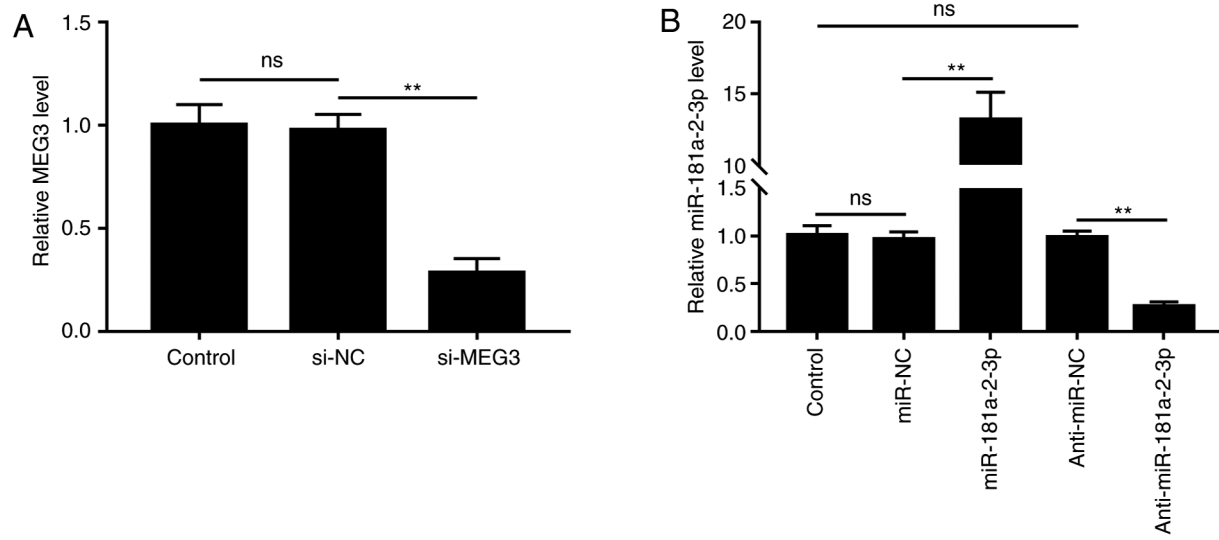

Supplement: Supplementary_Data.pdf [file Supplementary_Data.pdf]
